# Supplementary material
Source: publisher site journal article supplement (https://www.dovepress.com/article/570297)

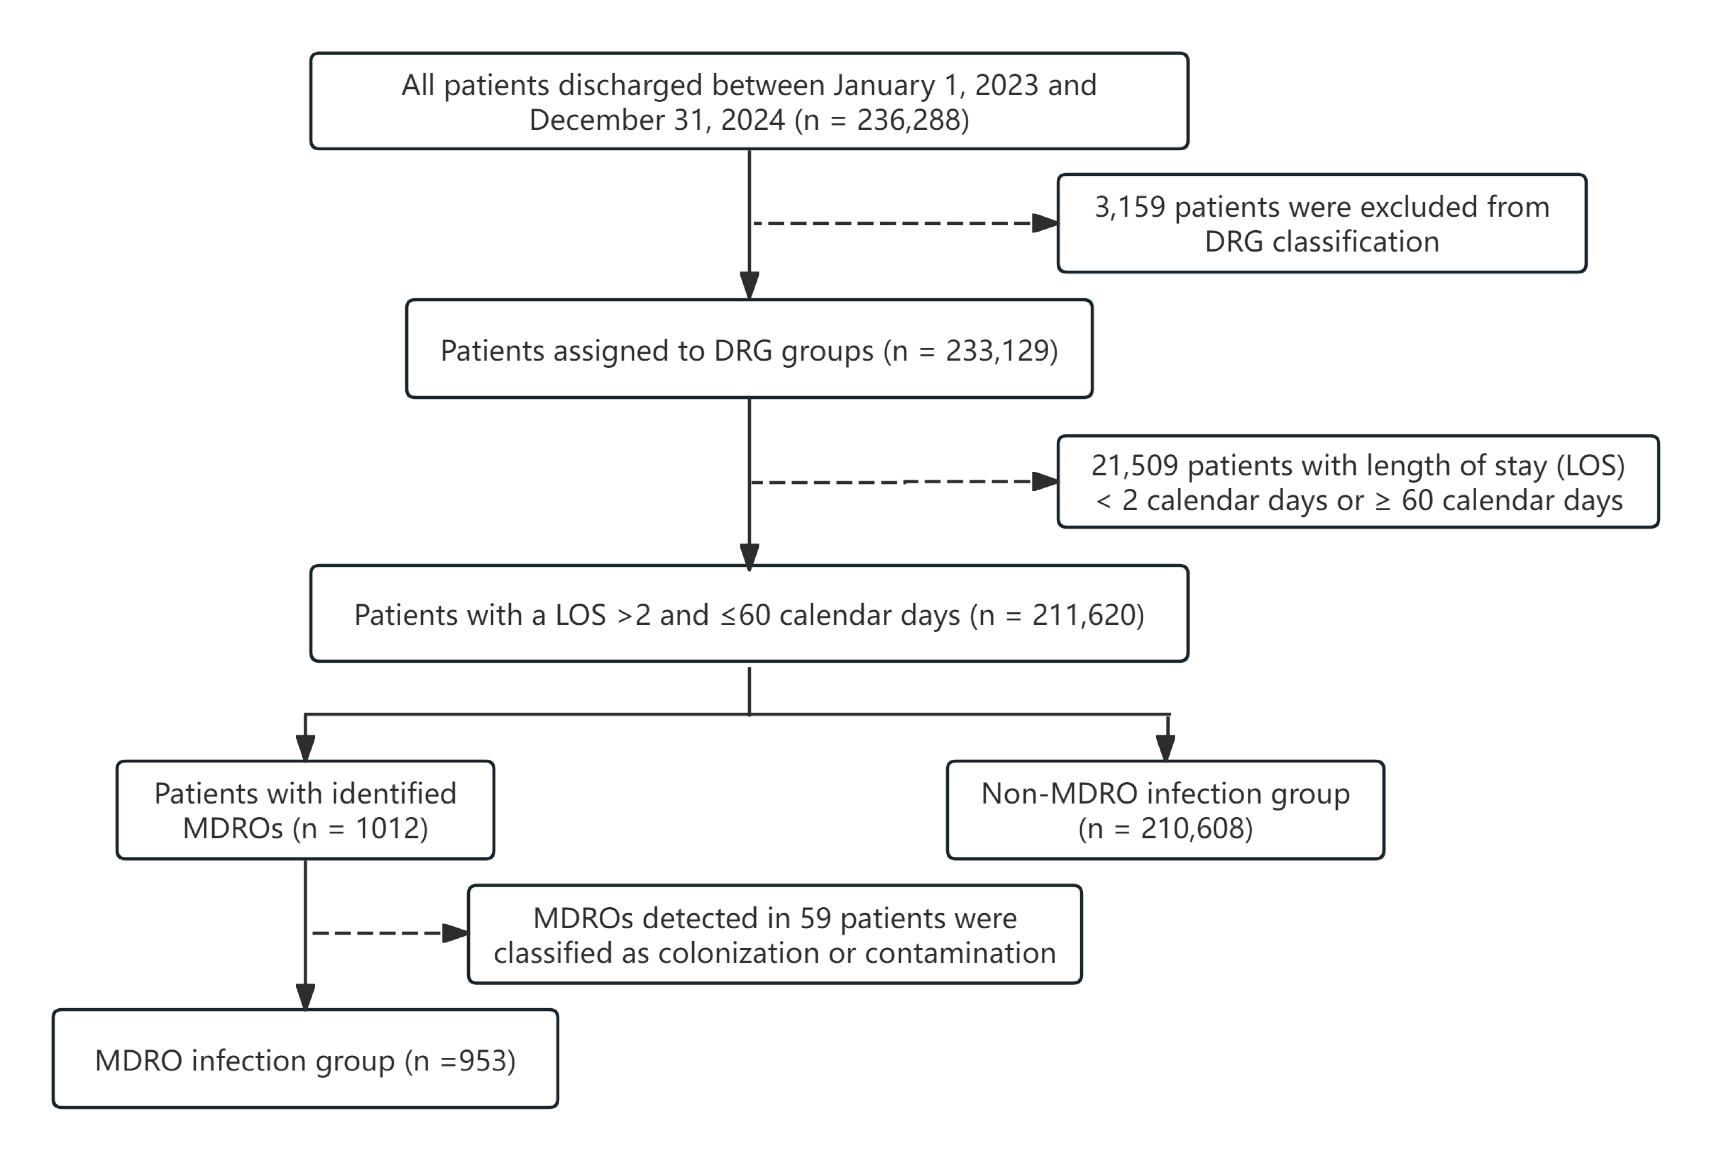


**Figure S1 Flowchart of Patient Enrollment.**

Supplement: Supplementary file 1 [file 570297%20Revised%20figure%20s1.docx]
